# Supplementary material for: Treatment goal setting for complex patients: protocol for a scoping review
Source: PubMed Central journal article supplement — BMJ Open. 2016 May 25;6(5):e011869. doi: 10.1136/bmjopen-2016-011869 (PMC4885433; doi:10.1136/bmjopen-2016-011869), 2016-05-25
Supplement: bmjopen-2016-011869supp.pdf [file bmjopen-2016-011869supp.pdf]

## Appendix 1: Preliminary Medline Search

Database: Ovid MEDLINE(R) <1946 to February Week 4 2016>, Ovid MEDLINE(R) In-Process & Other Non-Indexed Citations <March 07, 2016>

Search Strategy:

- 
- 1 (complex\* adj2 (need\* or patient\* or disease\* or ill\* or condition\* or insufficienc\* or disorder\*)).mp. (41949)
  - 2 Comorbidity/ (77656)
  - 3 (co-morbid\* or comorbid\*).mp. (155758)
  - 4 (multi-morbid\* or multimorbid\*).mp. (2162)
  - 5 (poly-patholog\* or polypatholog\*).mp. (135)
  - 6 (pluri-patholog\* or pluripatholog\*).mp. (26)
  - 7 ((multi\* or concurren\* or co-occur\* or co occur\* or co-exist\* or co exist\* or dual) adj2 (diagnos\* or disease\* or ill\* or condition\* or insufficienc\* or disorder\*)).mp. (69046)
  - 8 or/1-7 (258733)
  - 9 goals/ (13032)
  - 10 ((goal\* or priorit\* or target\*) adj3 (agree\* or negotiate\* or convers\* or discuss\* or propos\* or develop\* or formulat\* or elaborate\* or establish\* or identif\* or write or written or state\* or specif\* or construct\* or manag\* or direct\* or orient\* or cent?red or achiev\* or evaluat\* or attain\* or facilitat\* or misalign\* or align\* or care or outcome\* or plan\* or set\* or health or select\*)).tw. (252648)
  - 11 ((goal\* or priorit\* or target\* or value\* or preference\*) adj3 (patient\* or individual\* or personal\* or tailor\*)).tw. (80815)
  - 12 ((goal\* or priorit\* or target\* or preference\*) adj3 treatment\*).tw. (42842)
  - 13 ((goal\* or target\*) adj1 behavio\*).tw. (1749)
  - 14 advance care planning/ (1505)
  - 15 or/9-14 (365326)
  - 16 8 and 15 (9727)
  - 17 exp animals/ not (exp animals/ and humans/) (4191570)
  - 18 16 not 17 (9550)
  - 19 limit 18 to english language (8935)

## Appendix 2: Sample Screening Form

| Paper ID         | <b>POPULATION</b><br><b>Relevant to Patient Complexity:</b><br>1) directly use the term ‘complexity’, 2) address more than one concurrent chronic condition, compounded by frailty, palliative or life-limiting serious illness diagnoses, mental health conditions, and/or social challenges, or 3) focus on a complex chronic illness (e.g., dementia, stroke) that spans across more than one health dimension (as presented in the Complexity Framework).[4] | <b>TOPIC</b><br><b>Addresses goal elicitation, goal setting, or goal alignment between patients and/or caregivers and a health service provider</b> | <b>DECISION</b><br>(Include, Exclude, or Uncertain) |
|------------------|------------------------------------------------------------------------------------------------------------------------------------------------------------------------------------------------------------------------------------------------------------------------------------------------------------------------------------------------------------------------------------------------------------------------------------------------------------------|-----------------------------------------------------------------------------------------------------------------------------------------------------|-----------------------------------------------------|
| <b>Example 1</b> | Yes                                                                                                                                                                                                                                                                                                                                                                                                                                                              | Uncertain                                                                                                                                           | Uncertain<br>(Discuss with team)                    |
| <b>Example 2</b> | No                                                                                                                                                                                                                                                                                                                                                                                                                                                               | Uncertain                                                                                                                                           | Exclude                                             |
| <b>Example 3</b> | Yes                                                                                                                                                                                                                                                                                                                                                                                                                                                              | Yes                                                                                                                                                 | Include                                             |
